# Supplementary material for: Gas phase dehydration of glycerol to acrolein over WO3-based catalysts prepared by non-hydrolytic sol–gel synthesis
Source: Royal Society of Chemistry journal article supplement (doi:10.1039/c8ra01575a), 2018-01-01
Supplement: c8ra01575a1.pdf [file c8ra01575a1.pdf]

## **SUPPORTING INFORMATION**

### **Gas phase dehydration of glycerol to acrolein over WO<sub>3</sub>-based catalysts prepared by non-hydrolytic sol-gel synthesis**

L. Nadji,<sup>a,b</sup> A. Masso,<sup>a</sup> D. Delgado,<sup>a</sup> R. Issaadi,<sup>b</sup> E. Rodríguez-Aguado,<sup>c</sup> E. Rodríguez-  
Castellón,<sup>c</sup> J.M. López Nieto<sup>a,\*</sup>

<sup>a</sup> Instituto de Tecnología Química, Universitat Politècnica de València-Consejo Superior de Investigaciones Científicas, Avenida de los Naranjos s/n, 46022 Valencia, Spain.

<sup>b</sup> Laboratoire des Applications Energétiques de l'Hydrogène, Faculté de Technologie, Université Saad Dahlab, Blida 1, Algeria.

<sup>c</sup> Department of Inorganic Chemistry, University of Malaga, Campus de Teatinos, 29071, Málaga, Spain.

**Table S1.** Physicochemical characteristics of W-free samples, 0W-yZrSi, prepared by NHSG.

| Catalyst  | Zr/(Zr+Si) atomic ratio (EDX)<br>% | Surface area,<br>m <sup>2</sup> g <sup>-1</sup> | Pore diameter,<br>nm | Pore volumen,<br>cm <sup>3</sup> g <sup>-1</sup> | TPD-NH <sub>3</sub>           |                                 | FTIR<br>Pyridineadsorption<br>B /(B+L) |
|-----------|------------------------------------|-------------------------------------------------|----------------------|--------------------------------------------------|-------------------------------|---------------------------------|----------------------------------------|
|           |                                    |                                                 |                      |                                                  | $\mu\text{mol NH}_3/\text{g}$ | $\mu\text{mol NH}_3/\text{m}^2$ |                                        |
| 0W-Si     | 0                                  | 583                                             | 11.9                 | 1.28                                             | 107                           | 0.18                            | -                                      |
| 0W-10ZrSi | 10.1                               | 334                                             | 4.2                  | 1.2                                              | 859.9                         | 2.6                             | 0.23                                   |
| 0W-20ZrSi | 19.6                               | 274                                             | 3.0                  | 0.6                                              | -                             | -                               | 0.13                                   |
| 0W-40ZrSi | 37.9                               | 233                                             | 2.1                  | 0.3                                              | -                             | -                               | 0.12                                   |
| 0W-Zr     | 100                                | 50                                              | 4.5                  | 0.1                                              | -                             | -                               | -                                      |

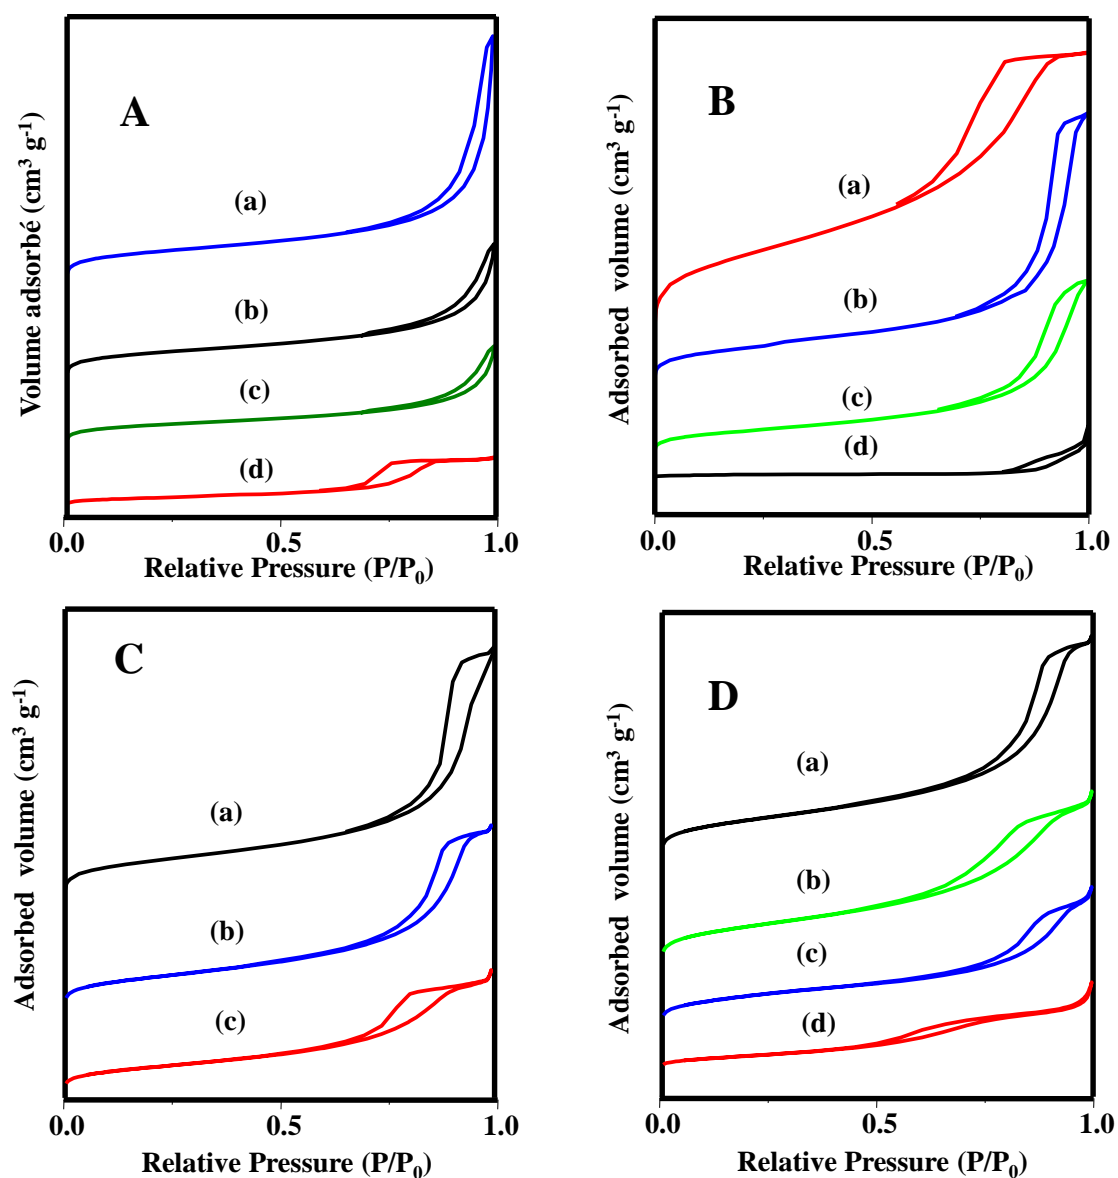

**Fig.S1.** Adsorption-desorption isotherm hysteresis of different catalysts prepared by non-hydrolytic sol gel method. **A)** 0W-10ZrSi (a); 0W-20ZrSi (b); 0W-40ZrSi (c) and ZrO<sub>2</sub> (d); **B)** 5W-Si (a); 15W-Si (b), 35W-Si (c) and WO<sub>3</sub> (d); **C)** 5W-10-ZrSi (a); 15W-10ZrSi (b): and 35W-10ZrSi (c); **D)** 15W10-ZrSi (a); 15W-20ZrSi (b); 15W-40ZrSi (c); and 15W-Zr (d).

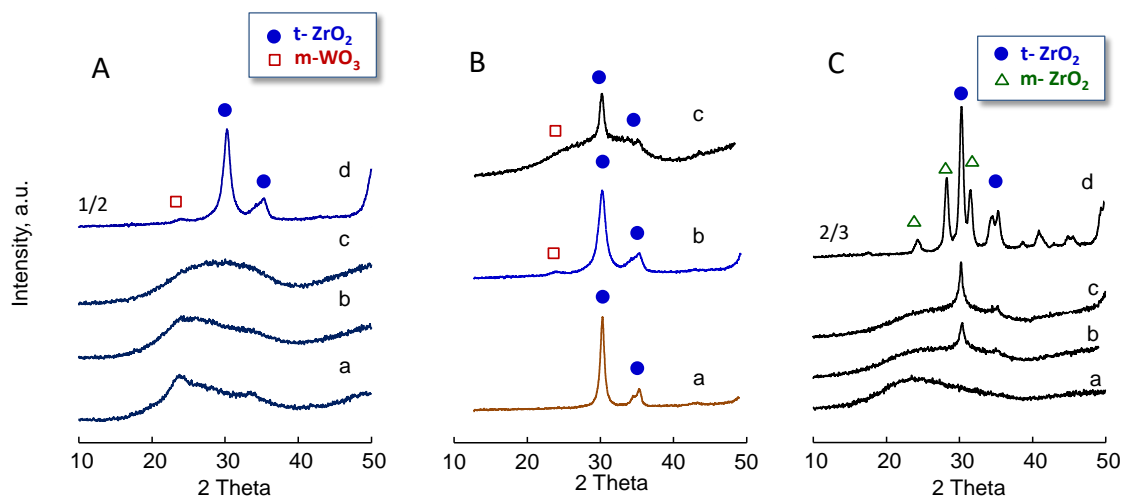

Figure S2. **A)** XRD patterns of W-containing catalysts of 15W-yZrSi series: a) 15W-10ZrSi; b) 15W-20ZrSi; 15W-40ZrSi; 15W-Zr.  
**B)** XRD patterns of W-containing catalysts of xW-Zr series: a) 5W-Zr; b) 15W-Zr; c) 35W-Zr.  
**C)** XRD patterns of W-free samples: a) 0W-10ZrSi; b) 0W-20ZrSi; c) 0W-40ZrSi; 0W-Zr

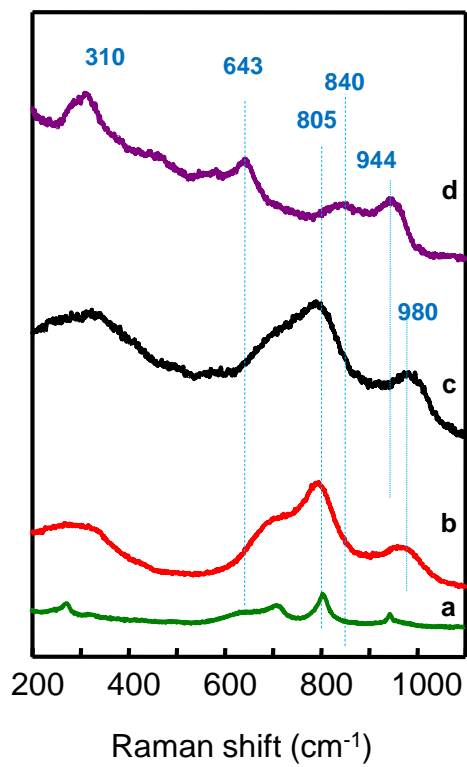

Figure S3. Raman spectra of W-containing catalysts with different Zr/Si ratio: a) 15W-Si; b) 15W-10ZrSi; c) 15W-20ZrSi; d) 15W-Zr.

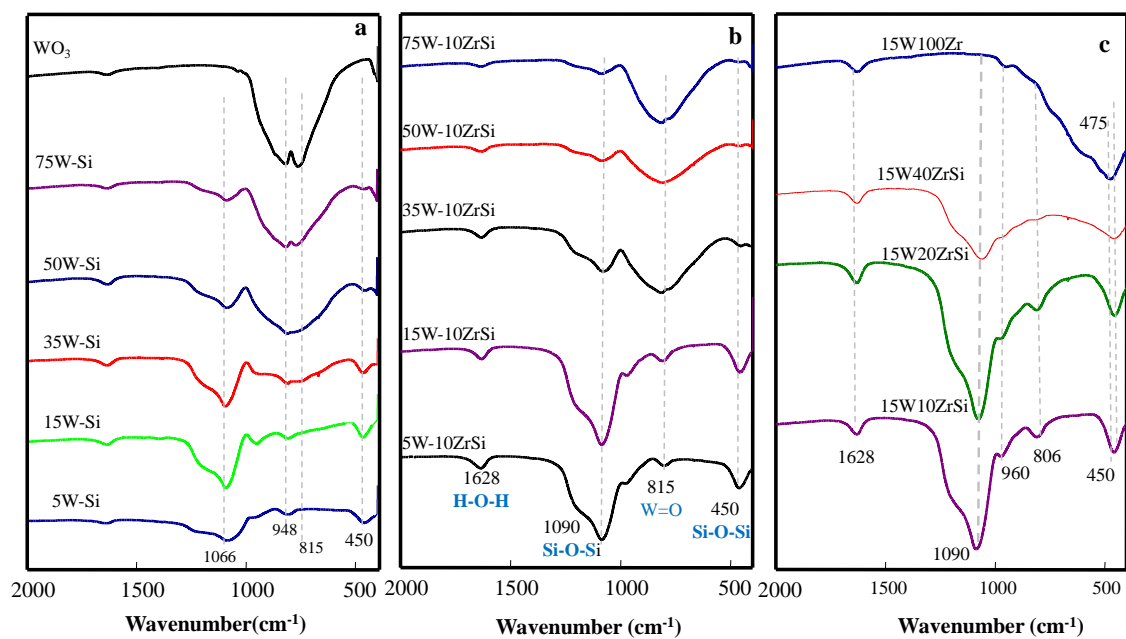

**Fig. S4.** FTIR Spectra of W-containing catalysts: a) xW-Si series; b) xW-10ZrSi series; c) xW-yZrSi series.

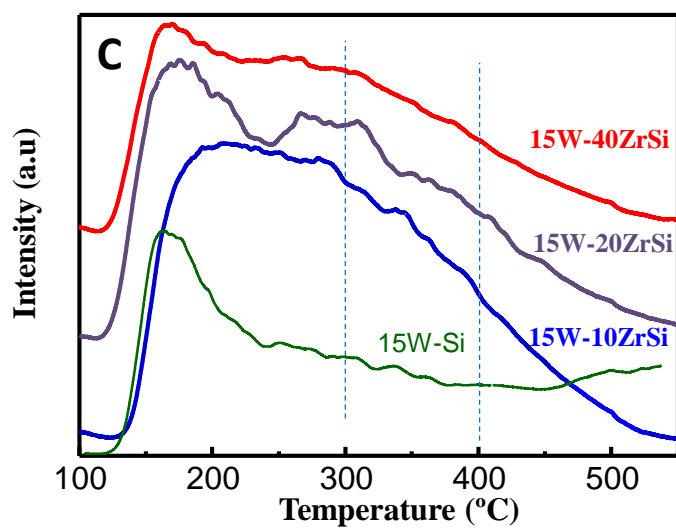

**Fig. S5.** TPD-NH<sub>3</sub> profiles of 15W-yZrSi catalysts (y = 0, 10, 20, 40).

Table S2. Acidic properties of catalysts prepared by NHSG.

| Catalyst        | TPD- NH <sub>3</sub>                        |                                             | B/(B+L) <sup>a</sup> |
|-----------------|---------------------------------------------|---------------------------------------------|----------------------|
|                 | $\mu\text{mol}_{\text{NH}_3} \text{g}^{-1}$ | $\mu\text{mol}_{\text{NH}_3} \text{m}^{-2}$ | FTIR (pyridine)      |
| 0W-Si           | 107                                         | 0.184                                       | n.d.                 |
| 5W-Si           | 455                                         | 0.588                                       | 0.19                 |
| 15W-Si          | 564                                         | 1.190                                       | 0.21                 |
| 35W-Si          | 371                                         | 1.344                                       | 0.29                 |
| 50WSi           | n.d.                                        | n.d.                                        | 0.15                 |
| 75W-Si          | n.d.                                        | n.d.                                        | n.d.                 |
| WO <sub>3</sub> | 57.2                                        | 1.907                                       | n.d.                 |
| 0W10ZrSi        | 860                                         | 2.575                                       | n.d.                 |
| 5W-10ZrSi       | 825                                         | 1.299                                       | n.d.                 |
| 15W-10ZrSi      | 817                                         | 1.865                                       | 0.18                 |
| 35W-10ZrSi      | 790                                         | 2.959                                       | 0.40                 |
| 50W-10ZrSi      | 604                                         | 5.345                                       | n.d.                 |
| 75W-10ZrSi      | n.d.                                        | n.d.                                        | n.d.                 |
| 15W-20ZrSi      | 712                                         | 2.132                                       | n.d.                 |
| 15W-40ZrSi      | 590                                         | 2.554                                       | 0.31                 |
| 15W-Zr          | 378                                         | 2.681                                       | n.d.                 |

<sup>a</sup> B: amount of Brönsted acid sites, L: amount of Lewis acid sites



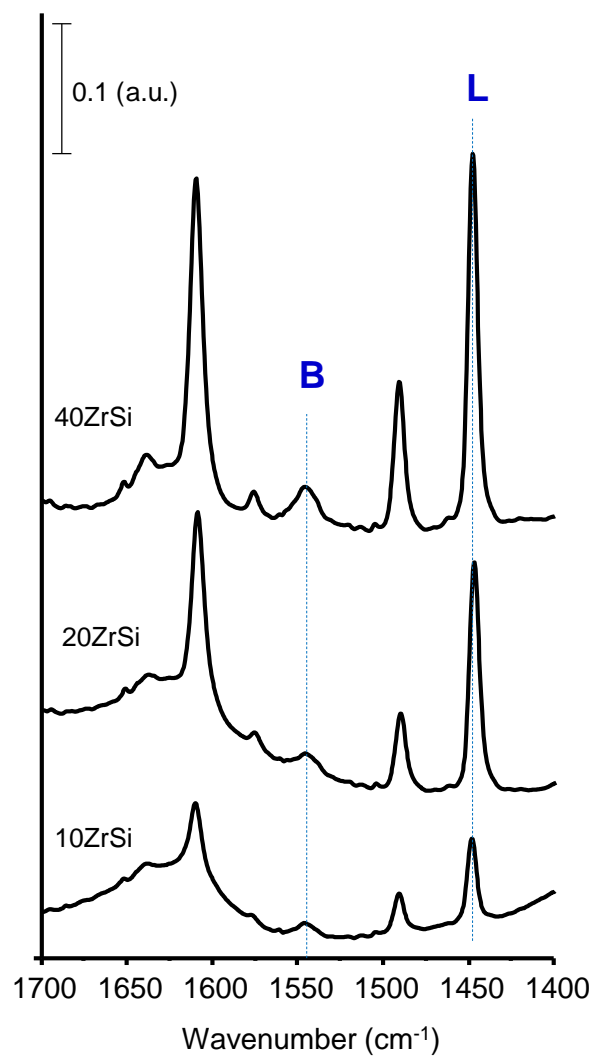

**Fig. S6.** FTIR of adsorbed pyridine spectrum of W-free samples, i.e.  $y\text{ZrSi}$  materials.

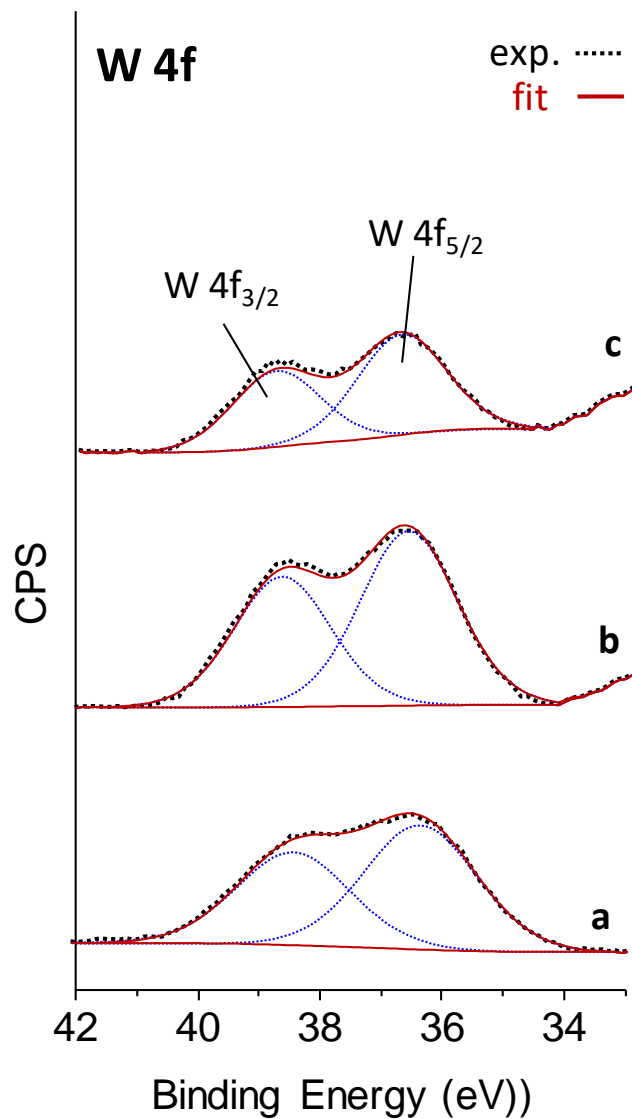

**Fig. S7.** W 4f core-level XPS spectra of 15W-yZrSi catalysts: a)15W-20ZrSi; b)15W40ZrSi; and c) 15W-Zr.

Table S3. Catalytic performance of WSi catalysts prepared by NHSG.

| Samples         | Conversion | Yield        | Selectivity |              |              |             |      | C-balance |       |
|-----------------|------------|--------------|-------------|--------------|--------------|-------------|------|-----------|-------|
|                 | (%)        | Acrolein (%) | Acrolein    | Acetaldehyde | Acrylic Acid | Acetic Acid | COx  | Others    | (%)   |
| 0W-Si           | 71.0       | 5.9          | 8.3         | 0.0          | 0.1          | 0.1         | 16.6 | 9.1       | 38.0  |
| 5W-Si           | 90.8       | 69.8         | 76.8        | 0.8          | 0.4          | 1.7         | 2.6  | 2.7       | 93.6  |
| 15W-Si          | 100        | 82.2         | 82.2        | 2.5          | 0.8          | 6.0         | 4.1  | 0.8       | 96.3  |
| 35W-Si          | 100        | 90.1         | 90.1        | 3.0          | 0.2          | 5.5         | 4.1  | 0.2       | 103.1 |
| 50W-Si          | 100        | 74.0         | 74.0        | 3.5          | 0.8          | 5.8         | 9.5  | 0.1       | 93.8  |
| 75W-Si          | 100        | 74.4         | 74.4        | 3.1          | 0.9          | 8.2         | 9.9  | 0.8       | 97.2  |
| WO <sub>3</sub> | 99.8       | 78.9         | 79.0        | 2            | 0.1          | 0.7         | 10.4 | 0.6       | 93.8  |

- 1) Experimental conditions: 0.3 g catalyst; contact time, W/F, of **110**g<sub>cat</sub>h (mol<sub>glycerol</sub>)<sup>-1</sup>; Glyc/H<sub>2</sub>O/O<sub>2</sub>/He molar ratio of 2/40/4/54; Data measured after 90 min. on stream.
- 2) Carbon oxides, CO and CO<sub>2</sub>.

Table S4. Catalytic performance of xW-10ZrSi and 15W-yZrSi catalysts prepared by NHSG. <sup>1</sup>

| Samples    | W-content<br>(%) <sup>2</sup> | Zr-content<br>(%) <sup>3</sup> | Glycerol<br>Conversion<br>(%) | Yield<br>Acrolein<br>(%) | Selectivity (%) |              |                 |                |                              |        | C-balance<br>(%) |
|------------|-------------------------------|--------------------------------|-------------------------------|--------------------------|-----------------|--------------|-----------------|----------------|------------------------------|--------|------------------|
|            |                               |                                |                               |                          | Acrolein        | Acetaldehyde | Acrylic<br>Acid | Acetic<br>Acid | CO <sub>x</sub> <sup>4</sup> | Others |                  |
| 0W-10ZrSi  | 0                             | 10.1                           | 78.2                          | 53.0                     | 67.8            | 8.9          | 0.5             | 9.7            | 6.7                          | 9.1    | 38.0             |
| 5W-10ZrSi  | 3.6                           | 9.1                            | 88.4                          | 67.3                     | 76.1            | 8.8          | 0.2             | 4.2            | 2.3                          | 9.2    | 103              |
| 15W-10ZrSi | 15.1                          | 9.5                            | 99.9                          | 79.1                     | 79.1            | 5.6          | 0.3             | 3.2            | 2.6                          | 6.0    | 99.5             |
| 35W-10ZrSi | 36.6                          | 12.2                           | 99.1                          | 83.1                     | 83.8            | 5.8          | 0.1             | 7.2            | 3.5                          | 1.2    | 100.6            |
| 50W-10ZrSi | 45.8                          | 12.2                           | 99.6                          | 76.2                     | 76.5            | 2.6          | 0.4             | 5.6            | 4.5                          | 1.4    | 91.1             |
| 75W-10ZrSi | 71.2                          | 10.4                           | 100                           | 76.9                     | 76.9            | 3.1          | 0.6             | 7.0            | 9.1                          | 0.7    | 97.5             |
| 15W-20ZrSi | 13.9                          | 18.0                           | 100                           | 75.0                     | 75.0            | 3.46         | 0.25            | 3.06           | 2.3                          | 4.1    | 90.8             |
| 15W-40ZrSi | 15.1                          | 39.0                           | 100                           | 82.4                     | 82.3            | 5.58         | 0.11            | 2.33           | 2.4                          | 3.9    | 99.3             |
| 15W-Zr     | 13.3                          | 100                            | 100                           | 70.2                     | 70.2            | 4.60         | 0.39            | 7.97           | 5.1                          | 3.1    | 92.8             |

1) Experimental conditions: 0.3 g catalyst, contact time, W/F, 110g<sub>cat</sub>h (mol<sub>glycerol</sub>)<sup>-1</sup>; Glyc/H<sub>2</sub>O/O<sub>2</sub>/He molar ratio of 2/40/4/54; Data measured after 90 min. on stream; 2) W-content as W/(W+Zr+Si) atomic ratio in %; 3) Zr-content as Zr/(Zr+Si) ratio in %; 4) Carbon oxides, CO and CO<sub>2</sub>.

Table S5. Catalytic performance of pure and mixed oxides catalysts prepared by NHSG. <sup>1</sup>

| Samples   | Glycerol Conversion (%) | Yield Acrolein (%) | Selectivity (%) |              |              |             |                              |        | C-balance (%) |
|-----------|-------------------------|--------------------|-----------------|--------------|--------------|-------------|------------------------------|--------|---------------|
|           |                         |                    | Acrolein        | Acetaldehyde | Acrylic Acid | Acetic Acid | CO <sub>x</sub> <sup>2</sup> | Others |               |
| 0W-Si     | 71.0                    | 5.9                | 8.3             | 0.0          | 0.1          | 0.1         | 16.6                         | 9.1    | 38.0          |
| 0W-10ZrSi | 78.2                    | 53.0               | 67.8            | 8.9          | 0.5          | 9.7         | 6.7                          | 0.9    | 100.4         |
| 0W-20ZrSi | 99.9                    | 48.29              | 48.32           | 2.1          | 0.1          | 2.9         | 1.4                          | 11.8   | 67.1          |
| 0W-40ZrSi | 98.1                    | 38.3               | 39.0            | 2.7          | 0.2          | 2.8         | 1.6                          | 23.7   | 70.1          |
| 0W-Zr     | 89.8                    | 13.1               | 14.6            | 2.8          | 2.0          | 1.3         | 7.7                          | 40.5   | 69.0          |

- 1) Data measured after 90 min. on stream. Experimental conditions: 0.3 g catalyst; contact time, W/F, of **110**<sub>g<sub>cat</sub>h</sub> (mol<sub>GLY</sub>)<sup>-1</sup>; Glycerol/H<sub>2</sub>O/O<sub>2</sub>/He molar ratio of 2/40/4/54.
- 2) Carbon oxides, CO and CO<sub>2</sub>.
